# Supplementary material
Source: PubMed Central journal article supplement (PMC3028654)
Supplement: supp_31_4_652__1.pdf [file supp_31_4_652__1.pdf]

Online Supplementary Material:

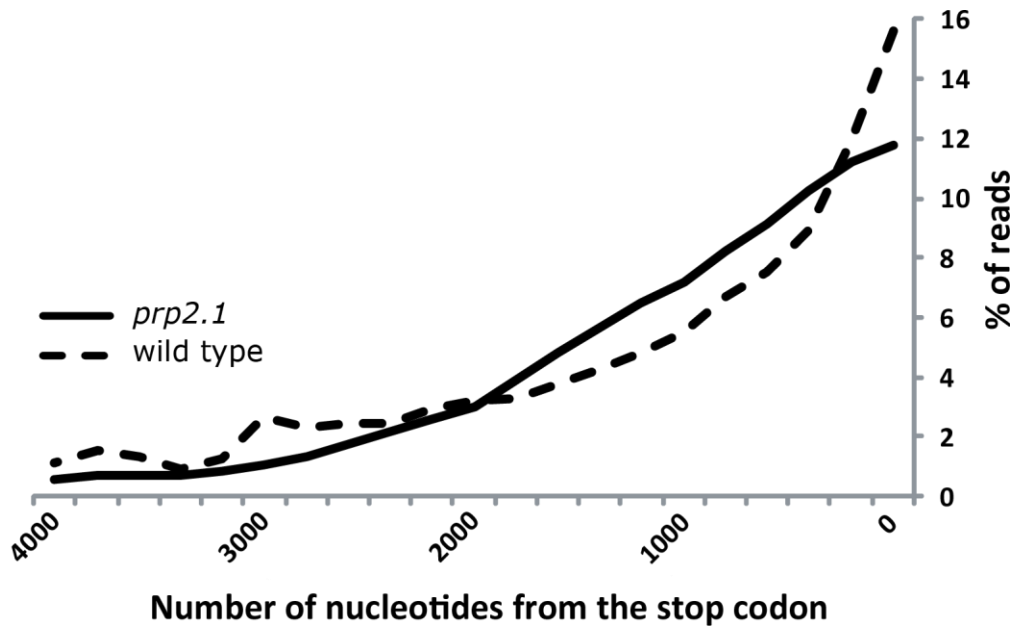

**Figure S1. A 3' bias is observed in the Solexa sequence reads.** The percentage of sequence reads mapped to the coding region of all genes, with respect to the position from the stop codon, in *prp2.1* mutant and the published wild type (1).

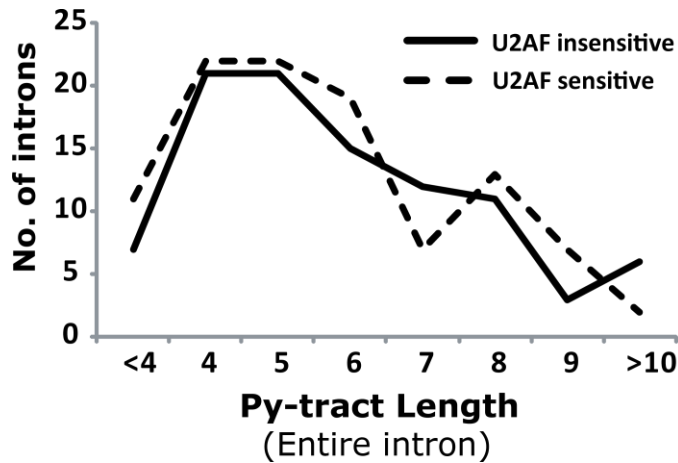

**Figure S2. Intron Py-tract strength did not correlate with U2AF insensitivity.** A histogram comparing the Py-tract length throughout the intron between U2AF-sensitive and -insensitive introns, (t-test  $P$ -value of 0.03).

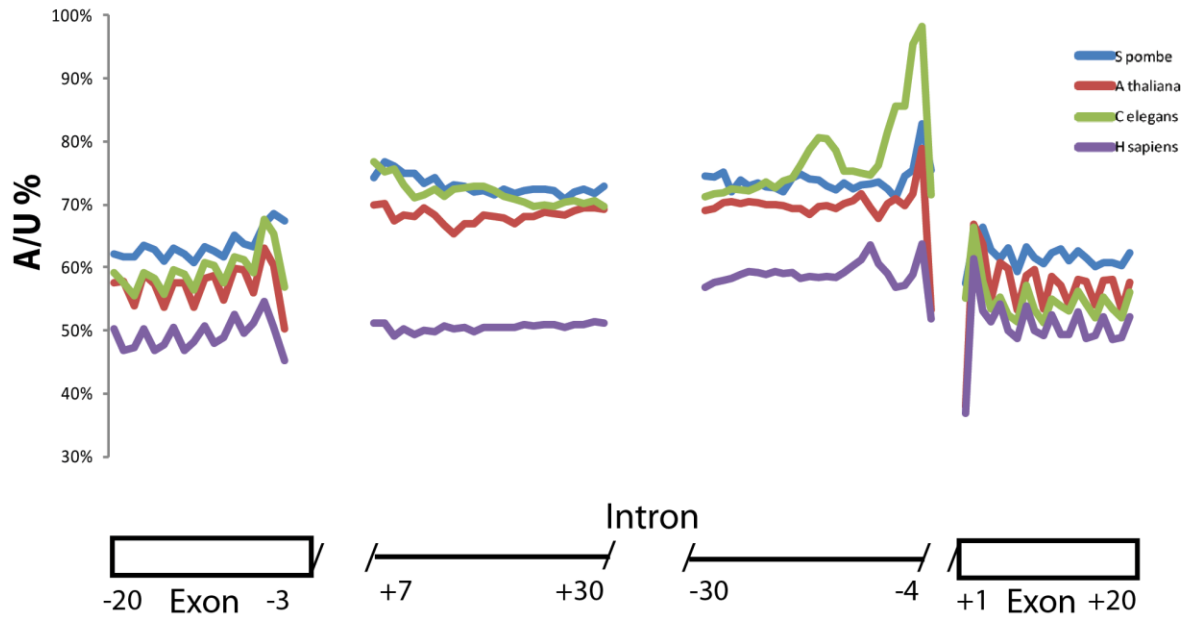

**Figure S3. Single-nucleotide distribution of A/U % in different organisms.** Single-nucleotide distribution of A/U% (Y-axis) in the intron and flanking exon sequences, indicated by the coordinates in relation to the splice sites. Rectangles represent exons and lines represent intron along the X-axis. Introns from four organisms (*S. pombe*, *A. thaliana*, *C. elegans*, and *H. sapiens*) were analyzed. All annotated introns from Sanger GeneDB at least 33 nts in length were used for *S. pombe*. NCBI annotated cis-spliced GT-AG introns were used for other organisms.

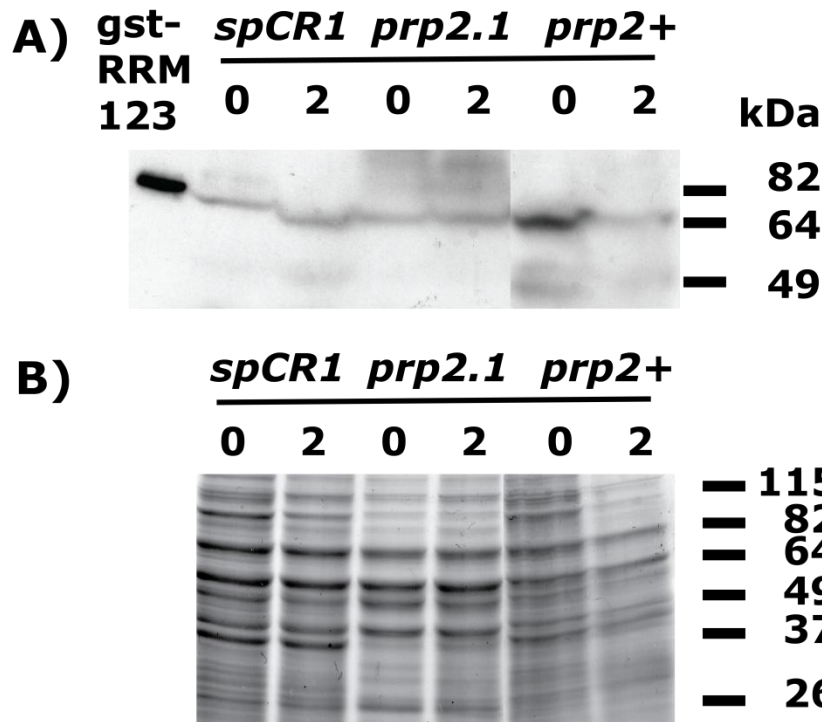

**Figure S4. The U2AF59 levels apparently remain stable upon heat inactivation in *prp2.1*.**

**A)** Western Analysis. Comparison of U2AF59 protein levels between wild type and *prp2.1* mutants. U2AF levels from crude lysates of *S. pombe* strains *spCR1* (endogenous U2AF), *prp2+* (plasmid expressed U2AF) and *prp2.1* grown for 0 and 2 hrs non permissive (37° C) temperatures were determined with anti-prp2 antibodies. The plasmid-expressed *gst-RRM123* served as a control is shown. The anti-prp2 delta-RS polyclonal antibodies were used at a 1:500 dilution. **B)** Protein staining. A fraction (1/10<sup>th</sup>) of the lysates used for Western analysis was stained for comparison of the protein levels.

**Supplementary Table 1. Oligonucleotides used for the study.**

| Primer                | SEQUENCE                                                                                                           |
|-----------------------|--------------------------------------------------------------------------------------------------------------------|
| atp3_a F              | AACGCTAACTCAGGCGTCTC                                                                                               |
| atp3_a R              | TCTTTTAGCGTTGCCTCACA                                                                                               |
| Bp cn inv F           | GCAAATACTAACAACAAATGTAGGAAAAGAGAG                                                                                  |
| Bp cn inv R           | ACTAATAATCTCTTAAAAACACTTACCTTCAGAAGC                                                                               |
| Bp15cd5p3p<br>invF    | TTCTAACCCTTTTTTAAGACTTTTGG                                                                                         |
| Bp15cd5p3p<br>invR    | TTCCCATGCATCCGTCTTAAAAACACTTACCGAACACAATTTGATCGAT<br>TATTC                                                         |
| Bp30 Cn inv R         | ACTAATAATCTCTTAAAAACACTTACCTTCAGAAGCATTAGGTAACGACT<br>CAAAAATC                                                     |
| Bpb1 F Nde            | GCGCATATGGCTGAATTCAAGGTCAGTAGGG                                                                                    |
| Bpb1 R Bam            | GCAGGATCCCTCATTCCATTTGCATCAGG                                                                                      |
| bpcd inv F            | CAAATTCTAACCCTTTTTTAAGACTTTTGG                                                                                     |
| bpcd inv F cdc        | CAAATTCTAACCCTTTTTTAAGACTTTTGG                                                                                     |
| bpcd inv R            | CACTAATAATCTCTTAAAAACACTTACCGAACACAATTTGATCGATTATT<br>C                                                            |
| bpcd inv R cdc        | CACTAATAATCTCTTAAAAACACTTACCGAACACAATTTGATCGATTATT<br>C                                                            |
| Bpcd invF             | TTCTAACCCTTTTTTAAGGTTTGAATAATACTCCCTTAGG                                                                           |
| Bpcd invF bpb         | TTCTAACCCTTTTTTAAGGTTTGAATAATACTCCCTTAGG                                                                           |
| Bpcd invR             | TTTGACTAATAATCTCTTAAAAACACTTAC                                                                                     |
| Bpcd invR bpb         | TTTGACTAATAATCTCTTAAAAACACTTAC                                                                                     |
| Cd15 Bp15 Cd<br>inv R | CACTAATAATCCAAGTAAAAACTTACCGAACACAATTTGATCGATTATT<br>C                                                             |
| Cd5p inv R            | CCATGCATCCGTCAAGTAAAAACTTAC                                                                                        |
| Cd7 Bp23 Cd<br>inv R  | CACTAATAATCTCTTAAAAAACTTACCGAACACAATTTGATCGATTATT<br>C                                                             |
| Cdbp inv F            | GCAAATTATTAATATTTTTTAGACTTTTGGATATTTTACATGCTGAATC                                                                  |
| cdbp invR             | CCCATGCATCCGTCAAGTAAAAACTTACCAGTAGACCCTACTGACCTTG                                                                  |
| cdmidR                | CAAAGTTTTATCAATGTAAACATTTCC                                                                                        |
| Cn7 Bp23 Cn<br>inv R  | ACTAATAATCTCTTAAAAATCCCCACCTTCAGAAGCATTAGGTAAC<br>CATTGCAAATTAATTAATATTTTTTAGGAAAAGAGAGAAAATTTATGATAT<br>CCTTATTGG |
| Cnbp clone F          | CATTGCAAATTAATTAATATTTTTTAGGAAAAGAGAG                                                                              |
| cnbp inv F            | CATTGCAAATTAATTAATATTTTTTAGGAAAAGAGAG                                                                              |
| cnbp inv R            | TCGTTTCTTGATTTAATCCCCACCTTC                                                                                        |
| Cox13_c F             | GGTGGACCAGCATTGATATTG                                                                                              |
| Cox13_c R             | CCAGGGTCCGTATCTTCAAC                                                                                               |
| Cwf25 F Nde           | GCGCATATGTGGGTGGTGGAGATCTAAATATG                                                                                   |
| Cwf25 R Bam           | GCAGGATCCGCTCGACTCGCTTCATCTCT                                                                                      |
| Cyp4 F Nde            | GCGCATATGGGACACCATGTTGTTTTTGG                                                                                      |
| Cyp4 R Bam            | GCAGGATCCTCACGGTTGTCAGTCTCAGC                                                                                      |
| Dim1_a F              | TTTTTACCTCATTTACATTTCTGGA                                                                                          |
| Dim1_a R              | GATAAAATTGCTTGATCAACGTG                                                                                            |
| Dim1_b F              | GCACGTTGATCAAGCAATTTT                                                                                              |
| Dim1_b R              | CCAAATCGAATGACAACCAA                                                                                               |

|                |                                      |
|----------------|--------------------------------------|
| Dim1 c F       | AAGAGCGCTTGGTTGTCATT                 |
| Dim1 c R       | AGCCATGTTGACGACCTTTT                 |
| Dim1 d F       | AGTGGACATTGACGAAGTTCC                |
| Dim1 d R       | TTGTAGTTCTGTCATAAAAGCTCGT            |
| Fim1 b F       | TGATTACAATCTTGTTACCGATGG             |
| Fim1 b R       | GATTACGGCACCCAACTTTC                 |
| gar1 b         | TGGTTCATAGGGCCAAAAGAC                |
| gar1 b F       | CATGCACGATTGTGAAGGAG                 |
| grx1 c F       | GAACAACGGTGATGAGATTCAA               |
| grx1 c R       | ACCAACATGCTTTTGGTGAA                 |
| mfm2 a F       | TGGACTCCATTGCAACTAACA                |
| mfm2 a R       | CCTTGGCAAAAAGATTCCAG                 |
| nmt polyA R    | AAACCCTAGCAGTACTGGCAAG               |
| Paa1 f F       | AAGCCATCCAAATTATTTATAACCG            |
| Paa1 f R       | TCCAAAGTTGGAAGAATTTGTTT              |
| Pgp2 a F       | GGTTTGTCCAATGCACCTTC                 |
| Pgp2 a R       | CGGAAAATGAACAATCCATACC               |
| Png2 F Nde     | GCGCATATGTTTGAAAGAGATCGATGCACA       |
| Png2 R Bam     | GCAGGATCCTCGCTCACATCTTTCTTCTCC       |
| Prep1F         | CACTTCTGACTTATAGTCGCTTTGTTAAATCATATG |
| ptp4 a F       | TGAAATTCCTCCGTAAAGCAC                |
| ptp4 a R       | AAGCTGGCCAGTTAAAACGA                 |
| Rhb1 a F       | GAATTGCTGTTCTTGGCAGTC                |
| Rhb1 a R       | GTTGGATAATACGATTCAACGAAA             |
| Rhb1 b F       | TTCGTGACAAGATATTGAATCACA             |
| Rhb1 b R       | CCAATGCTTTTCCCTCTTCA                 |
| rpl31 a F Nde  | GCGCATATGGCCATCAAGGAAATTTGTTGC       |
| rpl31 a R Bam  | GCAGGATCCTACCACGCTTCCAAACTTCC        |
| rpl35a a F     | ATTTGGGTAAGCGTGTTTGC                 |
| rpl35a a R     | ACCGGAGTTTCCATGAGGAC                 |
| Sar1 a F       | TAGATAACGCCGGAAAAGACC                |
| Sar1 a R       | ACGTTGCCAATAGCCAGTTC                 |
| sla1 a         | GGGTAAGTTGGTGTCCGAAA                 |
| sla1 a F       | CCGAGGAAGCTGGAAAAGTA                 |
| Spac6f6.05 a F | GGCTTTAACTCAACAGGAATTACAA            |
| Spac6f6.05 a R | TGGAGAAGCAAAACTCGAGAA                |
| Spbc32H F Nde  | GCGCATATGCAAAGAATGGAGAATTAGTTCGAGA   |
| Spbc32H R Bam  | GCAGGATCCCAATGATAACATGGTAGGGAGGT     |
| spi1 b F       | TGGCCTTCGTGATGGTTACT                 |
| spi1 b R       | TCACAAAACACGGACAAGATCA               |
| srp2 9 F       | TGACGAGCCTTAATGGTGAA                 |
| srp2 9 R       | GTGGAGAACGTGAACGGAAG                 |
| syb1 a F Nde   | GCGCATATGGTGGGGATTATGCGTGAAAA        |
| syb1 a R Bam   | GCAGGATCCTCTTCTTGCGAACACGATTG        |
| vma3 c F       | CCAAAGCTGGTGTCTGGTATT                |
| vma3 c R       | CAGCCATAACAACAGGAATGG                |

**Supplementary Table 2. 5' splice site bias in U2AF-insensitive versus U2AF-sensitive introns.** The two best 5' splice site sequences in terms of complementarity to the U1 snRNA (2) and the consensus (3) is GUAAGU and GUAUGU. Also shown are the versions including the consensus guanosine from the upstream exon.

| 5' splice site motif | U2AF-sensitive introns % | U2AF-insensitive introns % |
|----------------------|--------------------------|----------------------------|
| GUAAGU               | 18.9                     | 46.2                       |
| GUAUGU               | 9.4                      | 22.6                       |
| G   GUAAGU           | 2.8                      | 24.5                       |
| G   GUAUGU           | 3.7                      | 20.8                       |

1. **Wilhelm, B. T., S. Marguerat, S. Watt, F. Schubert, V. Wood, I. Goodhead, C. J. Penkett, J. Rogers, and J. Bahler.** 2008. Dynamic repertoire of a eukaryotic transcriptome surveyed at single-nucleotide resolution. *Nature* **453**:1239-43.
2. **Alvarez CJ, Romfo CM, Vanhoy RW, Porter GL, Wise JA.** 1996. Mutational analysis of U1 function in *Schizosaccharomyces pombe*: pre-mRNAs differ in the extent and nature of their requirements for this snRNA in vivo. *RNA* **2**:404-18.
3. **Kupfer DM, Drabenstot SD, Buchanan KL, Lai H, Zhu H, Dyer DW, Roe BA, Murphy JW.** 2004. Introns and splicing elements of five diverse fungi. *Eukaryot Cell.* **3**:1088-100.
